# MIND TO MIND

*Creative writing that explores the abstract side  
of our profession and our lives*

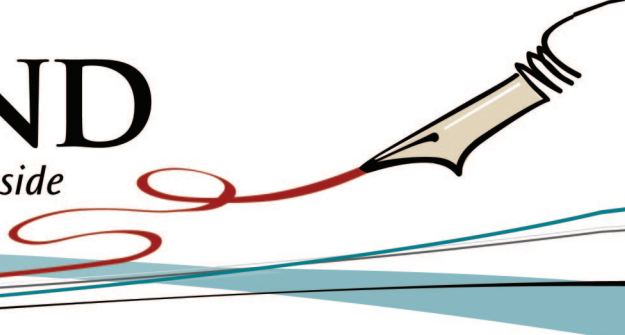

*Carol Wiley Cassella, M.D., Editor*

## Transient Ischemic Attack

Raymond C. Roy, M.D., Ph.D.\*

I  
INFINITE SKY, horizon light  
Encompass me. I'm losing sight.  
Fair wind, luffed sails, can't come about  
Submarine rock, no warning shout  
Listing larboard, absent belief  
That God or man will veer the reef  
That wrecks my hull, leaves me aground  
The bar uncrossed, deep sea unfound.  
Then soundings mark a safer draft.  
Red triangle is hoisted aft.

\* Wake Forest University School of Medicine, Winston-Salem, North Carolina. rroy@wfubmc.edu

Accepted for publication June 24, 2010.

Copyright © 2011, the American Society of Anesthesiologists, Inc. Lippincott Williams & Wilkins. Anesthesiology 2011; 114: 458
